# Supplementary material
Source: Springer Nature journal article supplement (https://www.springermedizin.de/resource/supplementary/12936_2005_148_MOESM5_ESM.pdf/9546996)

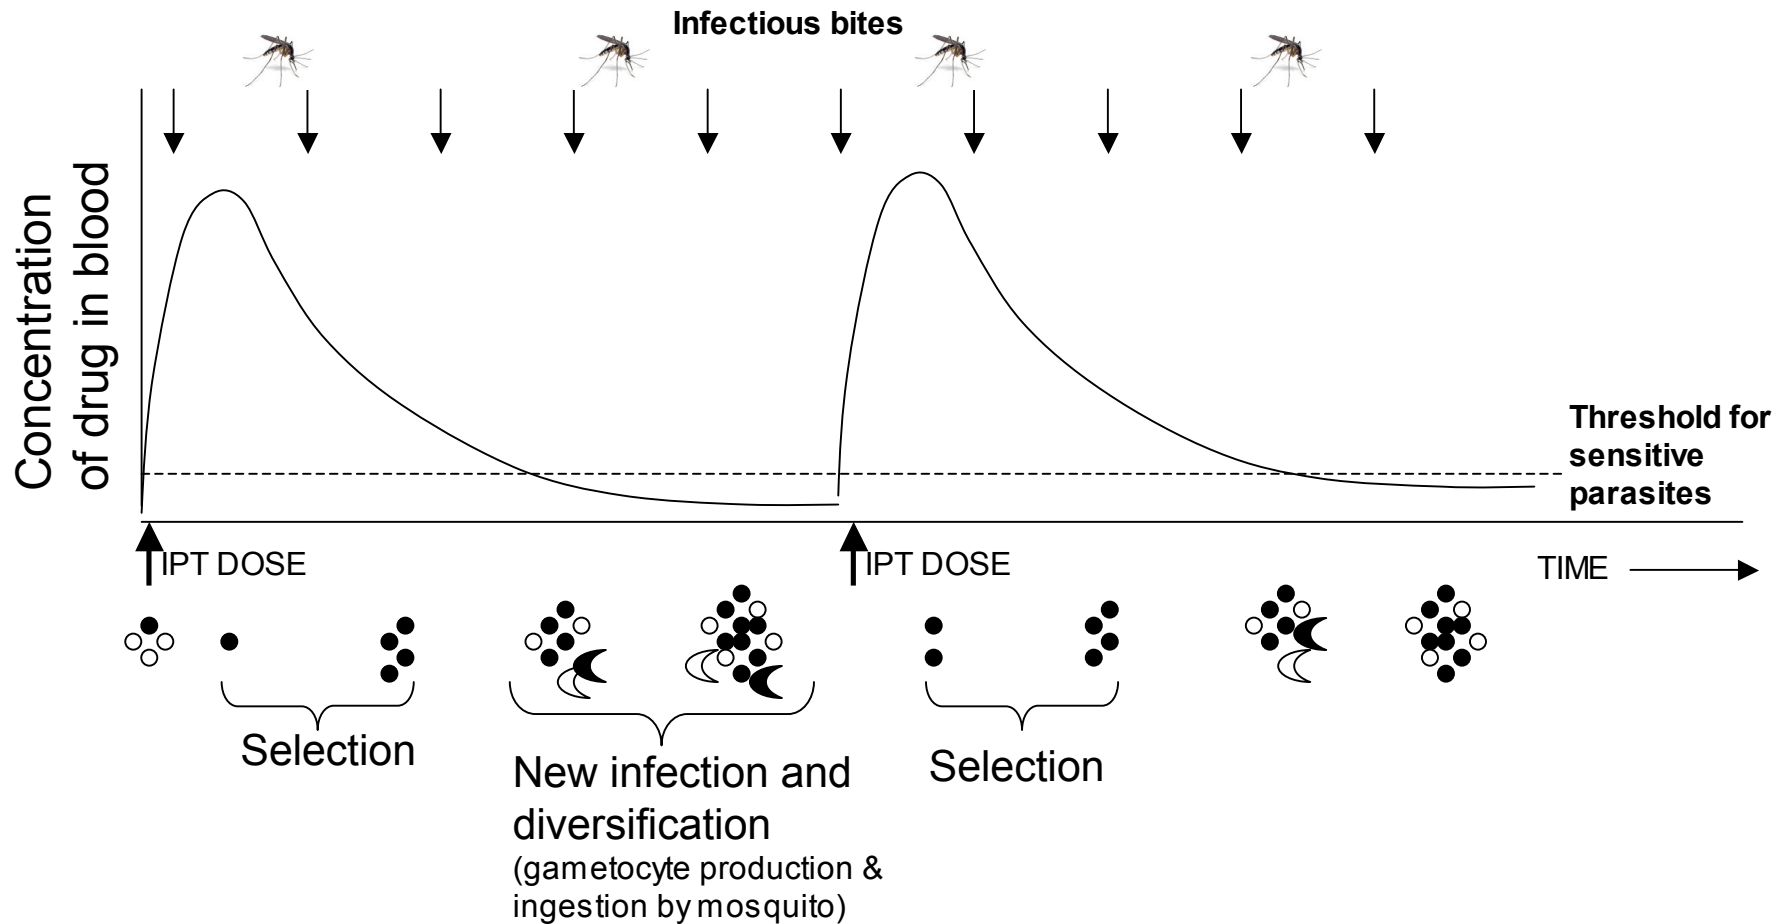

Supplement: MOESM5 [file 9546996]
